# Supplementary material for: Rescue of Methionine Dependence by Cobalamin in a Human Colorectal Cancer Cell Line
Source: MDPI journal article supplement (doi:10.3390/nu16070997), 2024-03-28
Supplement: s1 [file s1]

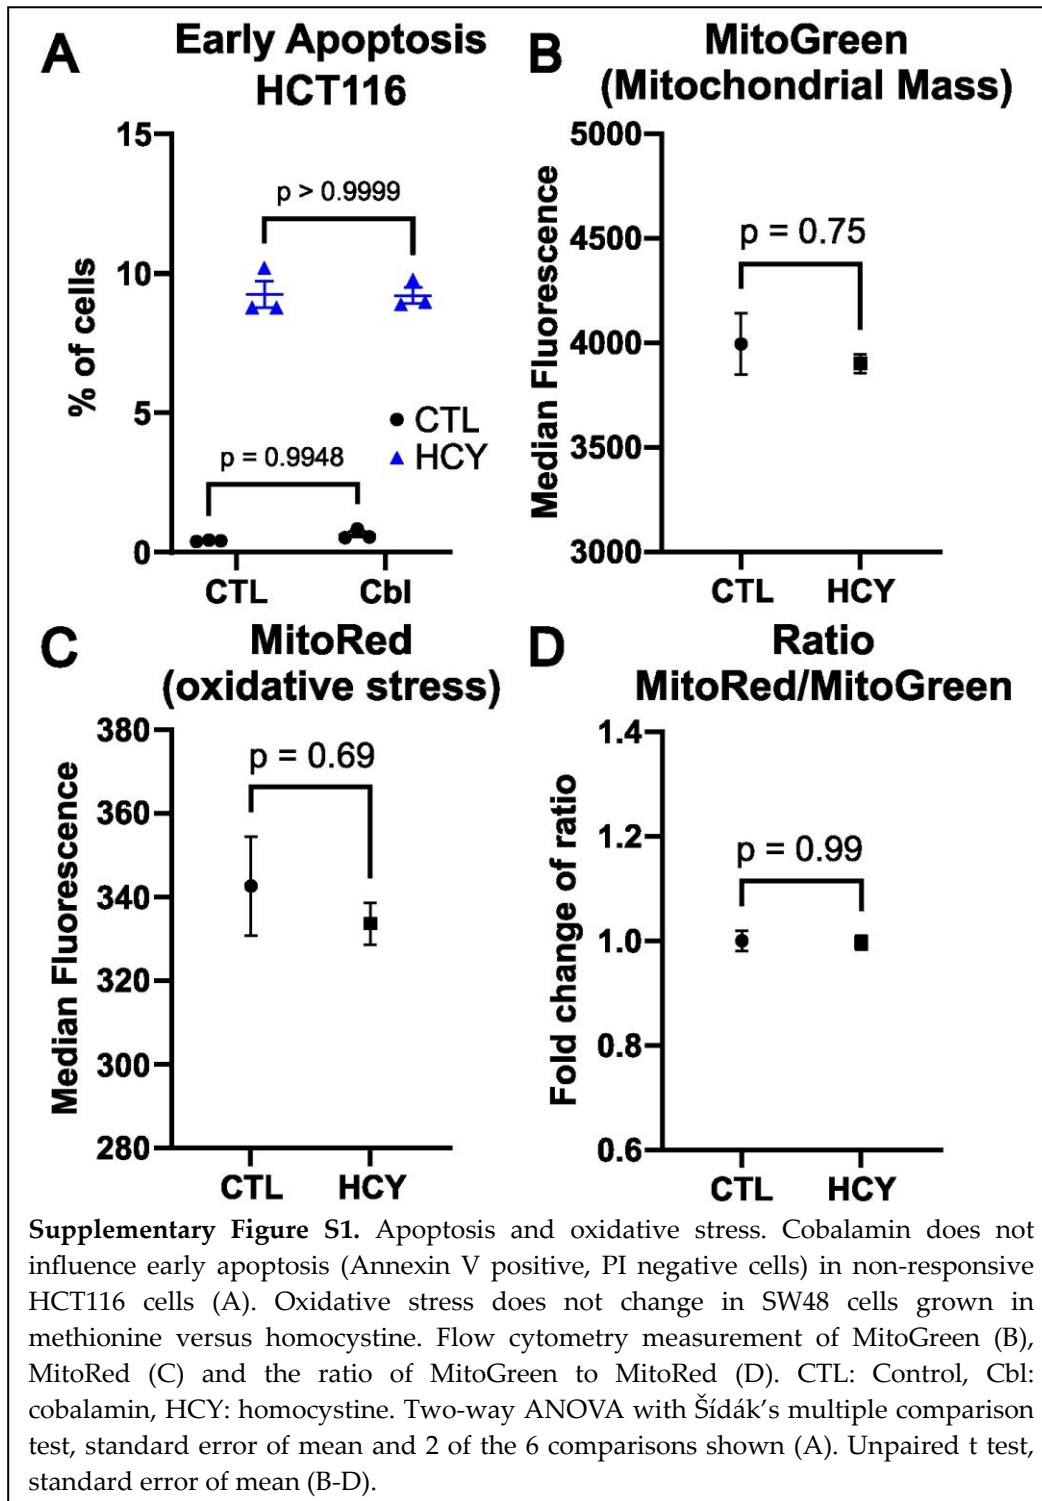

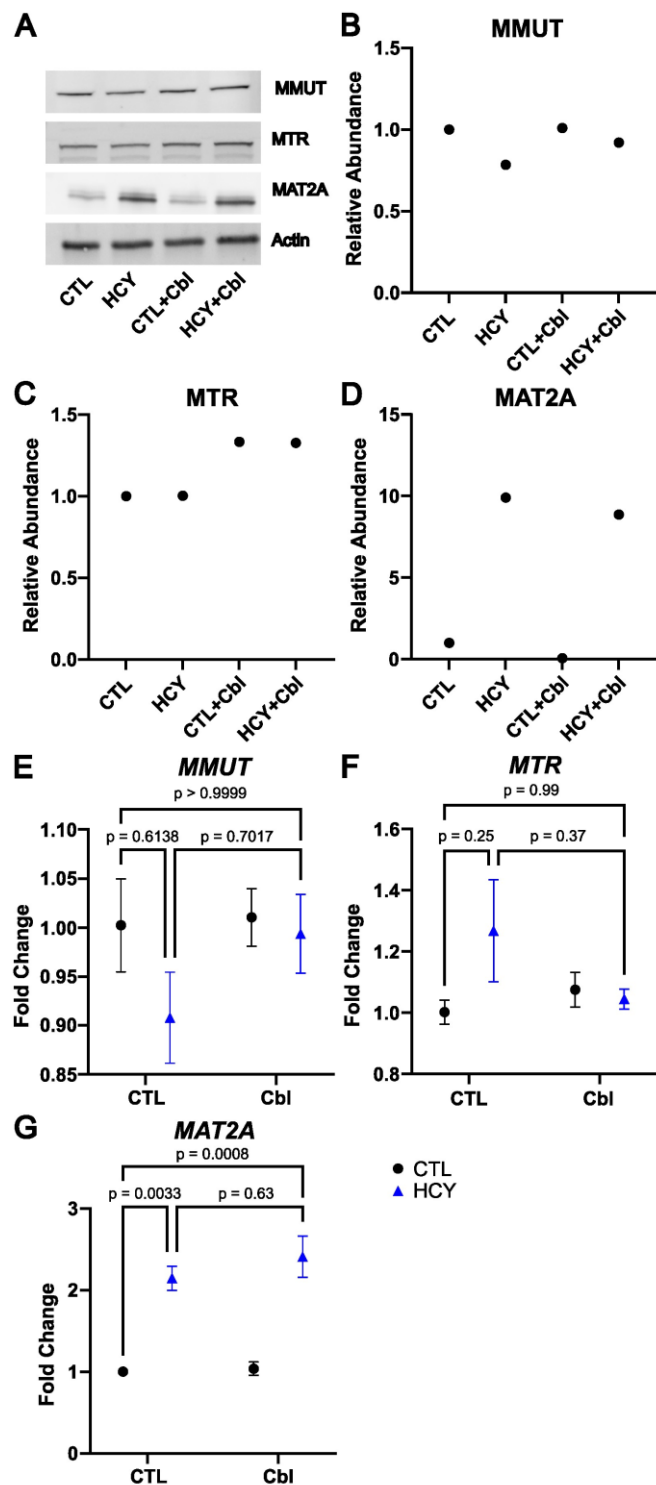

**Supplementary Figure S2.** Protein abundance and gene expression in SW48 with treatment. Western blot of the proteins MMUT, MTR, and MAT2A compared to the loading control  $\beta$ -actin (A). Quantified protein abundance relative to  $\beta$ -actin for MMUT (B), MTR (C), and MAT2A (D). Gene expression of the genes *MMUT* (E), *MTR* (F), and *MAT2A* (G). CTL: Control, Cbl: cobalamin, HCY: homocystine (Blue). Two-way ANOVA with Šidák's multiple comparison test, standard error of mean and 3 of the 6 comparisons shown.
